# Supplementary material
Source: publisher site journal article supplement (https://www.dovepress.com/article/326518)
Supplement: Supplementary file 1 [file get_supplementary_file.php]

**Supplementary table 1** Data extraction sheet from REDCap

| Master data | |
| --- | --- |
| Record ID |  |
| Central personal registration numbera |  |
| Namea |  |
| Sex | Male:  Female: |
| Status | Alive:  Diseased: |
| Validation data | |
| Characteristic Darier´s disease skin lesions  (yellow-brown, scaly, and crusted papules) | Yes:  No: |
| Characteristic anatomical site of lesions  (Seboroic areas including the scalp, truncus, face, hair line and flexures) | Yes:  No: |
| Characteristic Darier´s disease nail changes  (Longitudinal lines, fissures, subungual hyperkeratosis, brittleness, and V-shaped notches distally) | Yes:  No: |
| Molecular genetic confirmation  (relevant pathogenic variant in the ATP2A2 gene) | Yes:  No: |
| Histopathological confirmation  (characteristic histological findings in Darier´s disease including acantholysis and dyskeratosis) | Yes:  No: |
| Family history of Darier´s disease  (one or more family members with similar symptoms or confirmed diagnosis) | Yes:  No: |
| Additional data on the diagnosis | |
| Most probable diagnosis |  |
| Gene variation  (if Molecular genetic confirmation = Yes) |  |
| Genetic family number  (if Molecular genetic confirmation = Yes) |  |
| SNOMED diagnosis of Darier´s Disease (M74440) | Yes:  No: |

aSensitive personal information including name and central personal registration number is excluded when the datasets are exported from the RedCap database
